# Supplementary material for: Prevalence and Prognostic Significance of Hyponatremia in Patients With Lung Cancer: Systematic Review and Meta-Analysis
Source: Frontiers journal article supplement (doi:10.3389/fmed.2021.671951), 2021-12-07
Supplement: Data_Sheet_2.PDF [file Data_Sheet_2.PDF]

# Quality in Prognostic Studies (QUIPS) tool for Risk of Bias Assessment

## Study participation:

- The study sample adequately represents the population of interest
- Adequate participation in the study by eligible persons
- Description of the source population or population of interest
- Description of the baseline study sample
- Adequate description of the sampling frame and recruitment
- Adequate description of the period and place of recruitment
- Adequate description of inclusion and exclusion criteria

|                      |                                                                                                                          |
|----------------------|--------------------------------------------------------------------------------------------------------------------------|
| <b>High Risk</b>     | The relationship between the PF and outcome is very likely to be different for participants and eligible nonparticipants |
| <b>Moderate Risk</b> | The relationship between the PF and outcome may be different for participants and eligible nonparticipants               |
| <b>Low Risk</b>      | The relationship between the PF and outcome is unlikely to be different for participants and eligible nonparticipants    |

## Study Attrition:

- The study data available (i.e., participants not lost to follow-up) adequately represent the study sample
- Adequate response rate for study participants
- Description of attempts to collect information on participants who dropped out
- Reasons for loss to follow-up are provided
- Adequate description of participants lost to follow-up
- There are no important differences between participants who completed the study and those who did not

|                      |                                                                                                                          |
|----------------------|--------------------------------------------------------------------------------------------------------------------------|
| <b>High Risk</b>     | The relationship between the PF and outcome is very likely to be different for completing and noncompleting participants |
| <b>Moderate Risk</b> | The relationship between the PF and outcome may be different for completing and noncompleting participants               |
| <b>Low Risk</b>      | The relationship between the PF and outcome is unlikely to be different for completing and noncompleting participants    |

## Prognostic Factor Measurement:

- The PF is measured in a similar way for all participants
- A clear definition or description of the PF is provided
- Method of PF measurement is adequately valid and reliable
- Continuous variables are reported or appropriate cut points are used
- The method and setting of measurement of PF is the same for all study participants
- Adequate proportion of the study sample has complete data for the PF
- Appropriate methods of imputation are used for missing PF data

|                      |                                                                                                          |
|----------------------|----------------------------------------------------------------------------------------------------------|
| <b>High Risk</b>     | The measurement of the PF is very likely to be different for different levels of the outcome of interest |
| <b>Moderate Risk</b> | The measurement of the PF may be different for different levels of the outcome of interest               |

|                 |                                                                                                       |
|-----------------|-------------------------------------------------------------------------------------------------------|
| <b>Low Risk</b> | The measurement of the PF is unlikely to be different for different levels of the outcome of interest |
|-----------------|-------------------------------------------------------------------------------------------------------|

#### Outcome Measurement:

- The outcome of interest is measured in a similar way for all participants
- A clear definition of the outcome is provided
- Method of outcome measurement used is adequately valid and reliable
- The method and setting of outcome measurement is the same for all study participants

|                      |                                                                                                       |
|----------------------|-------------------------------------------------------------------------------------------------------|
| <b>High Risk</b>     | The measurement of the outcome is very likely to be different related to the baseline level of the PF |
| <b>Moderate Risk</b> | The measurement of the outcome may be different related to the baseline level of the PF               |
| <b>Low Risk</b>      | The measurement of the outcome is unlikely to be different related to the baseline level of the PF    |

#### Study Confounding:

- Important potential confounding factors are appropriately accounted for
- All important confounders are measured
- Clear definitions of the important confounders measured are provided
- Measurement of all important confounders is adequately valid and reliable
- The method and setting of confounding measurement are the same for all study participants
- Appropriate methods are used if imputation is used for missing confounder data
- Important potential confounders are accounted for in the study design
- Important potential confounders are accounted for in the analysis

|                      |                                                                                                                         |
|----------------------|-------------------------------------------------------------------------------------------------------------------------|
| <b>High Risk</b>     | The observed effect of the PF on the outcome is very likely to be distorted by another factor related to PF and outcome |
| <b>Moderate Risk</b> | The observed effect of the PF on outcome may be distorted by another factor related to PF and outcome                   |
| <b>Low Risk</b>      | The observed effect of the PF on outcome is unlikely to be distorted by another factor related to PF and outcome        |

#### Statistical Analysis and Reporting:

- The statistical analysis is appropriate, and all primary outcomes are reported
- Sufficient presentation of data to assess the adequacy of the analytic strategy
- Strategy for model building is appropriate and is based on a conceptual framework or model
- The selected statistical model is adequate for the design of the study
- There is no selective reporting of results

|                      |                                                                                                |
|----------------------|------------------------------------------------------------------------------------------------|
| <b>High Risk</b>     | The reported results are very likely to be spurious or biased related to analysis or reporting |
| <b>Moderate Risk</b> | The reported results may be spurious or biased related to analysis or reporting                |
| <b>Low Risk</b>      | The reported results are unlikely to be spurious or biased related to analysis or reporting    |
